# Supplementary material for: Impact of Fertilizer on Crop Yield and C:N:P Stoichiometry in Arid and Semi-Arid Soil
Source: MDPI journal article supplement (doi:10.3390/ijerph18084341), 2021-04-20
Supplement: s1 [file s1]

Table S1. Basic physical and chemical properties of the soil before fertilization.

| <b>Fertilization treatments</b> | <b>SOC (g/kg)</b> | <b>TN(g/kg)</b> | <b>TP(g/kg)</b> | <b>AN(mg/kg)</b> | <b>AP(mg/kg)</b> | <b>pH</b> |
|---------------------------------|-------------------|-----------------|-----------------|------------------|------------------|-----------|
| <b>CK</b>                       | 2.68              | 0.32            | 0.53            | 26.40            | 2.28             | 8.47      |
| <b>O</b>                        | 4.73              | 0.51            | 0.58            | 38.20            | 9.08             | 8.45      |
| <b>ON</b>                       | 4.24              | 0.52            | 0.59            | 44.40            | 5.14             | 8.41      |
| <b>ONP</b>                      | 4.27              | 0.49            | 0.74            | 33.70            | 32.89            | 8.43      |
| <b>OP</b>                       | 4.64              | 0.54            | 0.77            | 36.50            | 42.06            | 8.38      |
| <b>NK</b>                       | 2.84              | 0.36            | 0.52            | 28.50            | 1.11             | 8.45      |
| <b>NP</b>                       | 3.37              | 0.41            | 0.72            | 35.40            | 19.30            | 8.44      |
| <b>NPK</b>                      | 3.21              | 0.37            | 0.66            | 29.20            | 20.38            | 8.38      |
| <b>PK</b>                       | 2.77              | 0.32            | 0.70            | 24.00            | 19.02            | 8.47      |

Notes: CK: no fertilization; O, 0.75 kg/m<sup>2</sup> organic fertilizer; ON, 0.75 kg/m<sup>2</sup> organic fertilizer and 0.021kg/m<sup>2</sup> nitrogen; ONP, 0.75 kg/m<sup>2</sup> organic fertilizer, 0.021kg/m<sup>2</sup> nitrogen and 0.017 kg/m<sup>2</sup> phosphorus; OP, 0.75 kg/m<sup>2</sup> organic fertilizer and 0.017 kg/m<sup>2</sup> phosphorus; NP, 0.017 kg/m<sup>2</sup> phosphorus and 0.021kg/m<sup>2</sup> nitrogen; NK, 0.012 kg/m<sup>2</sup> potash and 0.021kg/m<sup>2</sup> nitrogen; NPK, 0.012 kg/m<sup>2</sup> potash, 0.021kg/m<sup>2</sup> nitrogen and 0.017 kg/m<sup>2</sup> phosphorus; PK, 0.012 kg/m<sup>2</sup> potash and 0.017 kg/m<sup>2</sup> phosphorus.

Table S2. The slope parameters of the linear regression models for soil organic carbon (SOC) content.

| <b>Fertilization treatments</b> | <b>Equations</b> | <b>R<sup>2</sup></b> | <b>P</b> |
|---------------------------------|------------------|----------------------|----------|
| <b>CK</b>                       | Y=0.12X-240.32   | 0.886                | 0.002    |
| <b>O</b>                        | Y=0.24X-477.02   | 0.825                | 0.005    |
| <b>ON</b>                       | Y=0.23X-464.51   | 0.871                | 0.002    |
| <b>ONP</b>                      | Y=0.15X-303.15   | 0.381                | N        |
| <b>OP</b>                       | Y=0.21X-411.61   | 0.706                | 0.018    |
| <b>NK</b>                       | Y=0.12X-228.61   | 0.839                | 0.004    |
| <b>NP</b>                       | Y=0.13X-253.18   | 0.934                | 0.000    |
| <b>NPK</b>                      | Y=0.12X-239.15   | 0.899                | 0.001    |
| <b>PK</b>                       | Y=0.13X-259.64   | 0.963                | 0.000    |

Notes: CK: no fertilization; O, 0.75 kg/m<sup>2</sup> organic fertilizer; ON, 0.75 kg/m<sup>2</sup> organic fertilizer and 0.021kg/m<sup>2</sup> nitrogen; ONP, 0.75 kg/m<sup>2</sup> organic fertilizer, 0.021kg/m<sup>2</sup> nitrogen and 0.017 kg/m<sup>2</sup> phosphorus; OP, 0.75 kg/m<sup>2</sup> organic fertilizer and 0.017 kg/m<sup>2</sup> phosphorus; NP, 0.017 kg/m<sup>2</sup> phosphorus and 0.021kg/m<sup>2</sup> nitrogen; NK, 0.012 kg/m<sup>2</sup> potash and 0.021kg/m<sup>2</sup> nitrogen; NPK, 0.012 kg/m<sup>2</sup> potash, 0.021kg/m<sup>2</sup> nitrogen and 0.017 kg/m<sup>2</sup> phosphorus; PK, 0.012 kg/m<sup>2</sup> potash and 0.017 kg/m<sup>2</sup> phosphorus.

Table S3. The slope parameters of the linear regression models for soil total nitrogen (TN) content.

| <b>Fertilization treatments</b> | <b>Equations</b> | <b>R<sup>2</sup></b> | <b>P</b> |
|---------------------------------|------------------|----------------------|----------|
| <b>CK</b>                       | Y=0.006X-12.580  | 0.734                | 0.014    |
| <b>O</b>                        | Y=0.017X-32.632  | 0.846                | 0.003    |
| <b>ON</b>                       | Y=0.017X-33.550  | 0.821                | 0.005    |
| <b>ONP</b>                      | Y=0.010X-20.195  | 0.206                | N        |
| <b>OP</b>                       | Y=0.012X-23.470  | 0.491                | N        |
| <b>NK</b>                       | Y=0.005X-10.448  | 0.568                | N        |
| <b>NP</b>                       | Y=0.006X-11.656  | 0.472                | N        |
| <b>NPK</b>                      | Y=0.005X-9.008   | 0.627                | 0.034    |
| <b>PK</b>                       | Y=0.005X-10.089  | 0.747                | 0.012    |

Notes: CK: no fertilization; O, 0.75 kg/m<sup>2</sup> organic fertilizer; ON, 0.75 kg/m<sup>2</sup> organic fertilizer and 0.021kg/m<sup>2</sup> nitrogen; ONP, 0.75 kg/m<sup>2</sup> organic fertilizer, 0.021kg/m<sup>2</sup> nitrogen and 0.017 kg/m<sup>2</sup> phosphorus; OP, 0.75 kg/m<sup>2</sup> organic fertilizer and 0.017 kg/m<sup>2</sup> phosphorus; NP, 0.017 kg/m<sup>2</sup> phosphorus and 0.021kg/m<sup>2</sup> nitrogen; NK, 0.012 kg/m<sup>2</sup> potash and 0.021kg/m<sup>2</sup> nitrogen; NPK, 0.012 kg/m<sup>2</sup> potash, 0.021kg/m<sup>2</sup> nitrogen and 0.017 kg/m<sup>2</sup> phosphorus; PK, 0.012 kg/m<sup>2</sup> potash and 0.017 kg/m<sup>2</sup> phosphorus.

Table S4. The slope parameters of the linear regression models for soil total phosphorus (TP) content.

| <b>Fertilization treatments</b> | <b>Equations</b>  | <b>R<sup>2</sup></b> | <b>P</b> |
|---------------------------------|-------------------|----------------------|----------|
| <b>CK</b>                       | $Y=0.005X-8.544$  | 0.283                | N        |
| <b>O</b>                        | $Y=0.003X-6.171$  | 0.161                | N        |
| <b>ON</b>                       | $Y=-0.001X+2.917$ | 0.060                | N        |
| <b>ONP</b>                      | $Y=0.009X-17.891$ | 0.791                | 0.007    |
| <b>OP</b>                       | $Y=0.007X-12.418$ | 0.576                | 0.048    |
| <b>NK</b>                       | $Y=0.000X-0.375$  | 0.006                | N        |
| <b>NP</b>                       | $Y=0.006X-10.876$ | 0.400                | N        |
| <b>NPK</b>                      | $Y=0.009X-17.323$ | 0.825                | 0.005    |
| <b>PK</b>                       | $Y=0.008X-14.477$ | 0.743                | 0.013    |

Notes: CK: no fertilization; O, 0.75 kg/m<sup>2</sup> organic fertilizer; ON, 0.75 kg/m<sup>2</sup> organic fertilizer and 0.021kg/m<sup>2</sup> nitrogen; ONP, 0.75 kg/m<sup>2</sup> organic fertilizer, 0.021kg/m<sup>2</sup> nitrogen and 0.017 kg/m<sup>2</sup> phosphorus; OP, 0.75 kg/m<sup>2</sup> organic fertilizer and 0.017 kg/m<sup>2</sup> phosphorus; NP, 0.017 kg/m<sup>2</sup> phosphorus and 0.021kg/m<sup>2</sup> nitrogen; NK, 0.012 kg/m<sup>2</sup> potash and 0.021kg/m<sup>2</sup> nitrogen; NPK, 0.012 kg/m<sup>2</sup> potash, 0.021kg/m<sup>2</sup> nitrogen and 0.017 kg/m<sup>2</sup> phosphorus; PK, 0.012 kg/m<sup>2</sup> potash and 0.017 kg/m<sup>2</sup> phosphorus.
